# Supplementary material
Source: HighWire-hosted journal article supplement (https://www.cmajopen.ca/highwire/filestream/88688/field_highwire_adjunct_files/1/open-2022-0077-2-at.pdf)
Supplement: open-2022-0077-2-at.pdf [file open-2022-0077-2-at.pdf]

Supplemental Table 2: Health economic evaluation assumptions

| Assumption                                                                                                                                                                                                                                                                                                                                                                                                                                                                                                                                                                                                                                                                                                                                                | Rationale                                                                                                                                                                                                                                                                                                                                                                                                                                                        |
|-----------------------------------------------------------------------------------------------------------------------------------------------------------------------------------------------------------------------------------------------------------------------------------------------------------------------------------------------------------------------------------------------------------------------------------------------------------------------------------------------------------------------------------------------------------------------------------------------------------------------------------------------------------------------------------------------------------------------------------------------------------|------------------------------------------------------------------------------------------------------------------------------------------------------------------------------------------------------------------------------------------------------------------------------------------------------------------------------------------------------------------------------------------------------------------------------------------------------------------|
| <p>Therapeutic remdesivir administration</p> <ul style="list-style-type: none"> <li>We assumed the unit cost of remdesivir across all jurisdictions from previously estimated costing in Ontario</li> </ul>                                                                                                                                                                                                                                                                                                                                                                                                                                                                                                                                               | <p>Pharmaceutical pricing/costing would likely reflect national/provincial formulary across all jurisdictions</p>                                                                                                                                                                                                                                                                                                                                                |
| <p>Concurrent co-interventions (e.g. anti-viral, antibiotic, anti-fungal administration, immunomodulators, other medications under investigation for COVID-19, other investigations (labs/radiology))</p> <ul style="list-style-type: none"> <li>We assumed that utilization of various concomitant co-interventions would be low/minor, and hence were excluded from analysis (e.g. oseltamivir, acyclovir, ganciclovir, lamivudine, valacyclovir, ritonavir, darunavir, efavirenz, convalescent plasma, hydroxychloroquine, baricitinib, sarilumab, anakinra, interferon beta)</li> </ul>                                                                                                                                                               | <p>In, general, various line-items were excluded (even if measured from CATCO CRF) if the following conditions were met:</p> <ul style="list-style-type: none"> <li>Low incidence of resource utilization</li> <li>Low overall unit cost per line-item</li> <li>Not plausibly expected to be impacted biologically/clinically by remdesivir administration</li> <li>Not expected to have incremental differences between remdesivir or placebo groups</li> </ul> |
| <p>Variability in investigations and treatment practice of disease/illness</p> <ul style="list-style-type: none"> <li>Based on variability in incidence of disease/illness, we will investigate the incidence of each illness severity, and average resource utilization for a particular illness</li> <li>We will utilize the mean costs for a particular illness (we will attempt to directly derive this variability from the case report forms) For patients who undergo multiple investigations, treatment (medications/procedures/surgeries) for a particular disease/illness, we will assume the lowest number of potential interventions to treat the disease/illness, as well as mean resource utilization for such events from CATCO</li> </ul> | <p>Various clinical diagnoses will have variability in severity, and therefore, variability in the way they are investigated and treated (i.e. <i>seizures</i> could be investigated/treated with a range of interventions: e.g. CT head, EEG, anti-epileptic drugs), therefore, we assumed the minimum amount of investigations/treatments for each specific illness</p>                                                                                        |
| <p>Investigation/interventions of other outcomes</p> <ul style="list-style-type: none"> <li>Certain assumptions will need to be made for healthcare resource utilization for certain services, investigations, procedures/surgeries, as they may not be explicitly captured in CATCO, but can be gleaned indirectly from the case report forms: <ul style="list-style-type: none"> <li>broncho-alveolar lavage (BAL) cultures were assumed to have a bronchoscopy procedure to perform them</li> <li>other viral etiologies were assumed to have a viral NAT swab sent</li> </ul> </li> </ul>                                                                                                                                                             | <p>There are certain investigations or interventions that would be expected to be associated with various disease state suspicions (and given correct circumstances, we would assume these would be tested/treated in these ways)</p>                                                                                                                                                                                                                            |

|                                                                                                                                                                                                                                                                                                                                                                                                                                                                                                                                                                                                                                                                                                                                                                                                                                                                                                                                                                                                                                                                                                                                                                                                                                                                                                                                                                                                                                                                                                                                                                                                                                                                                                                                                                                                                                                                                                                                                                                                                                                                                                                                          |  |
|------------------------------------------------------------------------------------------------------------------------------------------------------------------------------------------------------------------------------------------------------------------------------------------------------------------------------------------------------------------------------------------------------------------------------------------------------------------------------------------------------------------------------------------------------------------------------------------------------------------------------------------------------------------------------------------------------------------------------------------------------------------------------------------------------------------------------------------------------------------------------------------------------------------------------------------------------------------------------------------------------------------------------------------------------------------------------------------------------------------------------------------------------------------------------------------------------------------------------------------------------------------------------------------------------------------------------------------------------------------------------------------------------------------------------------------------------------------------------------------------------------------------------------------------------------------------------------------------------------------------------------------------------------------------------------------------------------------------------------------------------------------------------------------------------------------------------------------------------------------------------------------------------------------------------------------------------------------------------------------------------------------------------------------------------------------------------------------------------------------------------------------|--|
| <ul style="list-style-type: none"> <li>○ outcome of pneumothorax was assumed to require a chest tube (even if not formally recorded)</li> <li>○ pulmonary embolism/VTE diagnoses were assumed to have had a CT chest</li> <li>○ seizure diagnoses were assumed to have CT head, EEG and anti-epileptic drug prescription for standard interval (e.g. phenytoin weight based load)</li> <li>○ stroke diagnoses were assumed to have CT head</li> <li>○ Congestive heart failure diagnosis would entail a TTE</li> <li>○ Gastrointestinal bleed would entail an EGD</li> <li>○ High dependency unit days were costed using ICU unit costs</li> <li>○ NIV days were costed using IMV unit costs</li> <li>○ UF/CRRT/IHD unit costs were equivalent</li> <li>○ ECMO utilization includes per day cost, alongside cannulation costs (e.g. surgeon, anesthesia, nursing)</li> <li>○ initiation (on the first day) of intermittent hemodialysis or continuous renal replacement therapy would incur a cost of central venous hemodialysis line placement</li> <li>○ all hospital admissions would incur pan-cultures (urine, sputum, blood cultures)</li> <li>○ daily blood work assumed at minimum CBC, Cr, electrolytes</li> <li>○ ICU admission would assume ABGs twice daily, and placement of arterial line</li> <li>○ CXR were assumed to be performed during admission to hospital, admission to ICU and following intubation</li> <li>○ Following intubation and IMV initiation, assumed central line placement also</li> <li>○ Immunomodulator (tocilizumab) dosing: 400mg IV x 1 per patient (given shortage and dose rationing)</li> <li>○ Days of antibiotics were broken down by early antibiotics (e.g. for community acquired pneumonia) and later ventilator-associated pneumonias (or assumed to be VAP) <ul style="list-style-type: none"> <li>▪ Ceftriaxone 1g IV q24h x 7 days</li> <li>▪ Azithomycin 500mg x 1, then 250mg x 4 days</li> <li>▪ Additional antibiotic courses/days assumed to be: <ul style="list-style-type: none"> <li>• Piperacillin-tazobactam 3.375g IV q6h x 7 days</li> </ul> </li> </ul> </li> </ul> |  |
|------------------------------------------------------------------------------------------------------------------------------------------------------------------------------------------------------------------------------------------------------------------------------------------------------------------------------------------------------------------------------------------------------------------------------------------------------------------------------------------------------------------------------------------------------------------------------------------------------------------------------------------------------------------------------------------------------------------------------------------------------------------------------------------------------------------------------------------------------------------------------------------------------------------------------------------------------------------------------------------------------------------------------------------------------------------------------------------------------------------------------------------------------------------------------------------------------------------------------------------------------------------------------------------------------------------------------------------------------------------------------------------------------------------------------------------------------------------------------------------------------------------------------------------------------------------------------------------------------------------------------------------------------------------------------------------------------------------------------------------------------------------------------------------------------------------------------------------------------------------------------------------------------------------------------------------------------------------------------------------------------------------------------------------------------------------------------------------------------------------------------------------|--|

Appendix 2, as supplied by the authors. Appendix to: Lau V, Fowler R, Pinto R, et al. Cost-effectiveness of remdesivir plus usual care versus usual care alone for hospitalized patients with COVID-19: an economic evaluation as part of the Canadian Treatments for COVID-19 (CATCO) randomized clinical trial. *CMAJ Open* 2022. doi: 10.9778/cmajo.20220077. Copyright © 2022 The Author(s) or their employer(s). To receive this resource in an accessible format, please contact us at [cmajgroup@cmaj.ca](mailto:cmajgroup@cmaj.ca).

|                                                                                                                                                                                                                                                                                                                                                                                                                                                                                                                                                                                                                                                                                                                                                                                                                                                                                                                                                                                         |                                                                                                                                                                                                                                                                                                                                                                                            |
|-----------------------------------------------------------------------------------------------------------------------------------------------------------------------------------------------------------------------------------------------------------------------------------------------------------------------------------------------------------------------------------------------------------------------------------------------------------------------------------------------------------------------------------------------------------------------------------------------------------------------------------------------------------------------------------------------------------------------------------------------------------------------------------------------------------------------------------------------------------------------------------------------------------------------------------------------------------------------------------------|--------------------------------------------------------------------------------------------------------------------------------------------------------------------------------------------------------------------------------------------------------------------------------------------------------------------------------------------------------------------------------------------|
| <ul style="list-style-type: none"> <li>• If still on antibiotics past 2 weeks: <ul style="list-style-type: none"> <li>○ Imipenem-cilastin 500mg IV q6h x 7 days (for any other additional courses)</li> </ul> </li> <li>• If on antibiotics past 3 weeks: <ul style="list-style-type: none"> <li>○ At least one week course of Vancomycin (1.5g IV x 1 then, 1g IV q12h x 7 days)</li> </ul> </li> <li>○ Proning was assumed to occur 2x per day (with at least 5 people involved with proning, with their associated personal protective equipment: 1 gown, 1 N95 mask, 1 face-shield, 1 pair of gloves, 1 surgical mask)</li> </ul>                                                                                                                                                                                                                                                                                                                                                   |                                                                                                                                                                                                                                                                                                                                                                                            |
| <p>Imputation of missing data (missing resource use or unit costs)</p> <ul style="list-style-type: none"> <li>• For those patients with missing data from a clinical outcomes perspective, multiple imputation methods will be utilized – including generalized estimating equations (GEEs)</li> <li>• For missing unit costs (which are not attainable from public jurisdiction databases or trial site-specific inquiries), we will utilized a mean-unit cost approach</li> <li>• A mean unit cost approach was used, where the mean unit cost within a particular provinces (e.g. remainder of 6 provinces, if missing) was used to impute the missing jurisdictions unit costs (“mean cost approach”)</li> </ul>                                                                                                                                                                                                                                                                    | <p>We will utilize standard multiple imputation methods to handle missing clinical outcome data, or costing-ratio or mean cost approach methodology for missing unit costs</p>                                                                                                                                                                                                             |
| <p>Data collection: hospital time horizon and resource use natural units</p> <ul style="list-style-type: none"> <li>• Although collected, we only included resource use and outcomes to hospital discharge (as there was no mechanism to ensure accurate resource use collection as an outpatient)</li> <li>• Many resource uses were not measured necessarily by dosage on CATCO CRFs (e.g., opiates, vasopressor/inotropes) <ul style="list-style-type: none"> <li>○ Therefore, if there was an appropriate “standard dose” for non-titratable medications, it was applied to the resource use in question (usually measured in days on medication, or days intubated, or days in ICU) <ul style="list-style-type: none"> <li>▪ Micafungin 200mg IV x 1, then 100mg IV daily x 6 days <ul style="list-style-type: none"> <li>• No assumption made for possible COVID associated pulmonary aspergillosis (micafungin poses as surrogate</li> </ul> </li> </ul> </li> </ul> </li> </ul> | <p>These various assumptions derived either from main study CATCO methodology, our systematic review of health economic literature from probiotics, or from consultation with the E-CATCO steering committee</p> <p>Higher weight-based dosing (85kg) was assumed given the higher propensity of these patients in hospital compared to historical epochs (normally would assume 70kg)</p> |

Appendix 2, as supplied by the authors. Appendix to: Lau VI, Fowler R, Pinto R, et al. Cost-effectiveness of remdesivir plus usual care versus usual care alone for hospitalized patients with COVID-19: an economic evaluation as part of the Canadian Treatments for COVID-19 (CATCO) randomized clinical trial. *CMAJ Open* 2022. doi: 10.9778/cmajo.20220077. Copyright © 2022 The Author(s) or their employer(s). To receive this resource in an accessible format, please contact us at [cmajgroup@cmaj.ca](mailto:cmajgroup@cmaj.ca).

|                                                                                                                                                                                                                                                                                                                                                                                                                                                                                                                                                                                                                                                                                                                                                                                                                                                                                                                                                                                                                                                                                                                                                                                                                                                                                                                                                                                                                                                                                                                                                                                                                                                                                                                                                            |  |
|------------------------------------------------------------------------------------------------------------------------------------------------------------------------------------------------------------------------------------------------------------------------------------------------------------------------------------------------------------------------------------------------------------------------------------------------------------------------------------------------------------------------------------------------------------------------------------------------------------------------------------------------------------------------------------------------------------------------------------------------------------------------------------------------------------------------------------------------------------------------------------------------------------------------------------------------------------------------------------------------------------------------------------------------------------------------------------------------------------------------------------------------------------------------------------------------------------------------------------------------------------------------------------------------------------------------------------------------------------------------------------------------------------------------------------------------------------------------------------------------------------------------------------------------------------------------------------------------------------------------------------------------------------------------------------------------------------------------------------------------------------|--|
| <p style="text-align: center;">for voriconazole)</p> <ul style="list-style-type: none"> <li>▪ Phenytoin for seizures was assumed to be 15mg/kg IV load, then 100mg IV q8h x 7 days</li> <li>▪ Amiodarone for VT/VF/arrhythmia was 1mg/hr x 18 hours, then 0.5mg/hr x 30 hours, then stopped</li> <li>▪ Dalteparin VTE dosing was assumed to be 125 units/kg for patients with known VTE</li> <li>▪ Inhaled nitric oxide was assumed to be the cost of the non-disposable circuit x 50ppm (based on per day usage/unit costing)</li> </ul> <ul style="list-style-type: none"> <li>○ If there was a clinically appropriate “medium dose” for titratable medications (e.g. vasopressors/inotropes, opiate infusions, sedation infusions) were estimated for various medications <ul style="list-style-type: none"> <li>▪ Neuromuscular blockade use days were assumed to be rocuronium, and at a standard dose of 10mcg/kg/min (based on ventilator days)</li> <li>▪ Propofol use days assumed a medium dose of 50mcg/kg/min (built into ventilator days)</li> <li>▪ Midazolam use days assumed a 5mg/hour (built into ventilator days)</li> <li>▪ Hydromorphone use assumed to be 2mg/hour (built into ventilator days)</li> <li>▪ Illness severity scores (e.g. APACHE) were used to estimate medium doses <ul style="list-style-type: none"> <li>• Norepinephrine dosing included 0.05mcg/kg/min &amp; 0.15 mcg/kg/min based on illness severity</li> <li>• Dobutamine dosing: 2.5mcg/kg/min</li> </ul> </li> </ul> </li> <li>• All weight-based dosing was assumed to be for 85kg adult (instead of 70kg)</li> <li>• Base-case analysis patient to nurse ratios assumed to be: 1:1 in ICU, 1.5:1 in high dependency units, and 4:1 on the ward</li> </ul> |  |
|------------------------------------------------------------------------------------------------------------------------------------------------------------------------------------------------------------------------------------------------------------------------------------------------------------------------------------------------------------------------------------------------------------------------------------------------------------------------------------------------------------------------------------------------------------------------------------------------------------------------------------------------------------------------------------------------------------------------------------------------------------------------------------------------------------------------------------------------------------------------------------------------------------------------------------------------------------------------------------------------------------------------------------------------------------------------------------------------------------------------------------------------------------------------------------------------------------------------------------------------------------------------------------------------------------------------------------------------------------------------------------------------------------------------------------------------------------------------------------------------------------------------------------------------------------------------------------------------------------------------------------------------------------------------------------------------------------------------------------------------------------|--|

ABG = arterial blood gas; APACHE = Acute Physiologic Assessment and Chronic Health Evaluation; BAL = broncho-alveolar lavage; CATCO = Canadian Treatments for COVID-19; CBC = complete blood count; COVID-19 = coronavirus disease-19; Cr = creatinine; CRF = case-report forms; CRRT = continuous renal replacement therapy; CT = computerized tomography; CXR = chest x-ray; E-CATCO = Economic evaluation alongside CATCO; ECMO = extracorporeal membrane oxygenation; EEG = electroencephalogram; g = grams; ICU = intensive care unit; IHD = intermittent hemodialysis; IV = intravenous; kg = kilograms; mcg =

micrograms; mg = milligrams; min = minute; TTE = transthoracic echocardiogram; UF = ultrafiltration; VAP = ventilator-associated pneumonia; VF = ventricular fibrillation; VTE = venous-thromboembolism; VT = ventricular tachycardia;
